# Supplementary material for: Modulating the d-band center of boron doped single-atom sites to boost the oxygen reduction reaction
Source: Royal Society of Chemistry journal article supplement (doi:10.1039/c9ta06949f), 2019-01-01
Supplement: c9ta06949f1.pdf [file c9ta06949f1.pdf]

## Supporting Information

### Modulating d-band center of boron doped single-atom site to boost oxygen reduction reaction

He Sun,<sup>‡a</sup> Mengfan Wang,<sup>‡b</sup> Xinchuan Du,<sup>‡a</sup> Yu Jiao,<sup>c</sup> Sisi Liu,<sup>b</sup> Tao Qian,<sup>b</sup> Yichao Yan,<sup>a</sup> Chen Liu,<sup>d</sup> Min Liao,<sup>\*d</sup> Qinghua Zhang,<sup>e</sup> Linxing Meng,<sup>b</sup> Lin Gu,<sup>e</sup> Jie Xiong,<sup>\*a</sup> Chenglin Yan<sup>\*b</sup>

<sup>a</sup> State Key Laboratory of Electronic Thin Films and Integrated Devices, University of Electronic Science and Technology of China, Chengdu 610054, PR China

E-mail: jiexiong@uestc.edu.cn

<sup>b</sup> College of Energy, Key Laboratory of Advanced Carbon Materials and Wearable Energy Technologies of Jiangsu Province, Key Lab of Advanced Optical Manufacturing Technologies of Jiangsu Province & Key Lab of Modern Optical Technologies of Education Ministry of China, Soochow University, Suzhou 215006, PR China

E-mail: email: c.yan@suda.edu.cn

<sup>c</sup> School of Applied and Chemical Engineering, Xichang College, Xichang 615053, P. R. China

<sup>d</sup> Hunan Provincial Key Laboratory of Thin Film Materials and Devices, School of Materials Science and Engineering, Xiangtan University, Xiangtan 411105, PR China

E-mail: mliao@xtu.edu.cn

<sup>e</sup> Beijing National Laboratory for Condensed Matter Physics, Institute of Physics, Chinese Academy of Science, Beijing 100190, PR China

† Electronic supplementary information (ESI) available.

‡ These authors contributed equally.



## ***1. Sample preparation***

### **Synthesis of Fe<sub>SA</sub>/B,N-CNT, Fe<sub>SA</sub>/N-CNT, Fe<sub>NP</sub>/N-CNT and N doped carbon**

Typically, polyvinylpyrrolidone (4 g), zinc nitrate (0.42 g), and 2-methylimidazole (3.36 g) were dissolved in 40 ml deionized water in a glass vial. The mixture was stirred at room temperature for 3 h. After adding ferric chloride (40 mg) into the solution, The vial was capped and 120 °C oven for 12 h. Lyophilization was performed to dry the mixture. 100 mg of the obtained powder and 250 mg of sodium borohydride were placed at two separate positions in a ceramic crucible with the sodium borohydride at the upstream side. The samples were heated at 900 °C for 2 h under argon atmosphere. The pyrolysis products were acid-washed with 1 M HCl solution at 80 °C overnight and then filtered and washed with plenty of deionized water. The final catalysts were obtained by vacuum drying. For comparison, the Fe<sub>SA</sub>/N-CNT was synthesized following the same procedure as Fe<sub>SA</sub>/B,N-CNT, but without involving sodium borohydride in the pyrolysis process. Fe<sub>NP</sub>/N-CNT was synthesized following the same procedure as Fe<sub>SA</sub>/N-CNT, except for the addition of 240 mg ferric chloride. The N doped carbon was synthesized following the same procedure as Fe<sub>SA</sub>/N-CNT, except for the addition of ammonium persulfate (100 mg) instead of ferric chloride.

## ***2. Sample characterization***

The morphologies were observed with a field emission scanning electron microscope (FESEM, SU8010, Japan) and a field emission transmission electron microscope (FETEM, Tecnai G2 F20, Hong Kong). The dispersion of single Fe atoms was characterized by atomic-resolution high-angle annular dark-field scanning transmission electron microscopy (HAADF-STEM) on a JEOL JEM-ARM200F instrument equipped with probe spherical aberration corrector. The iron concentrations of the samples were conducted on the inductively coupled plasma atomic emission spectroscopy (ICP-OES). Surface elemental analysis was performed on XPS (Kratos Axis Ultra Dld, Japan). The X-ray absorption fine structure spectra (Fe K-edge) were collected at 1W1B station in Beijing Synchrotron Radiation Facility (BSRF). The storage rings of BSRF was operated at 2.5 GeV with a maximum current of 250 mA. Using Si (111) double-crystal monochromator, the data collection was carried out

in transmission mode using ionization chamber for Fe foil and in fluorescence excitation mode using a Lytle detector for Fe<sub>SA</sub>/B,N-CNT. All spectra were collected in ambient conditions. The composition of the catalysts was characterized by X-ray diffraction pattern (XRD, D8 Advance, Bruker) and Raman spectroscopy (HR evolution, Horiba Jobin Yvon, France). N<sub>2</sub>-sorption analysis was performed by an ASAP 2020 accelerated surface area and porosimetry instrument (Micromeritics), equipped with automated surface area, at 77 K using BET calculations for the surface area.

### 3. *Electrochemical measurements*

All electrochemical measurements were carried out in a conventional three-electrode system using WaveDriver 20 bipotentiostat (Pine Instrument Company, USA). A Rotating Disk Electrode (RDE) with a glassy carbon disk served as the substrate was used as the working electrode, a Ag/AgCl and carbon rod were used as reference and counter electrode. The catalyst ink was prepared by dispersing 2 mg catalysts and 0.5 mg Acetylene Black in 380  $\mu$ L ethanol and 20  $\mu$ L Nafion solution (5 wt%) in an ultrasonic bath for at least 30 min. 8  $\mu$ L of catalyst ink was then coated on glassy carbon disk. For comparison, Commercial Pt/C (20 wt%, Johnson Matthey) catalyst ink was prepared by dispersing 1 mg catalysts in 250  $\mu$ L ethanol and 10  $\mu$ L Nafion solution (5 wt%). 10  $\mu$ L of catalyst ink was then coated on glassy carbon disk. The electrolyte was 0.1 M KOH. Before each experiment, electrolyte was saturated with N<sub>2</sub>/O<sub>2</sub> by gassing with N<sub>2</sub>/O<sub>2</sub> for at least 30 min. CV tests were performed in N<sub>2</sub>- and O<sub>2</sub>-saturated alkaline solution at 50 mV s<sup>-1</sup>. LSV tests were performed in O<sub>2</sub>-saturated alkaline solution at 400, 625, 900, 1,225, 1,600, 2,025, 2,500 rpm with a scan rate of 10 mV s<sup>-1</sup>. Unless noted otherwise, all the potentials mentioned in this paper were versus RHE. RRDE tests were conducted in O<sub>2</sub>-saturated 0.1 M KOH solution with the scan rate of 10 mV s<sup>-1</sup> under the rotation rate of 1,600 rpm. For the analysis of peroxide yield, the ring potential was held constant at 1.2 V vs. RHE. The percent of H<sub>2</sub>O<sub>2</sub>, the number of electron transfer (n) and kinetic current density (J<sub>k</sub>) were determined by the following Koutecky–Levich equations:

$$\% (\text{H}_2\text{O}_2) = 200 \frac{I_r/N}{I_d + I_r/N} \quad (1)$$

$$n = \frac{I_d}{4(I_d + I_r/N)} \quad (2)$$

$$\frac{1}{J} = \frac{1}{J_L} + \frac{1}{J_k} \quad (3)$$

$$J_k = nFkC_0 \quad (4)$$

where  $I_d$  is the disk current,  $I_r$  is the ring current, and  $N$  ( $= 0.37$ ) is the current collection efficiency of the Pt ring,  $J$  is the measured current density,  $J_L$  and  $J_k$  are the limiting and kinetic current densities.  $n$  is the overall number of electrons transferred in oxygen reduction,  $F$  is the Faraday constant ( $F=96485 \text{ C mol}^{-1}$ ),  $C_0$  is the bulk concentration of  $O_2$ ,  $k$  is the electron-transfer rate constant.

The possible crossover effect caused by methanol was examined upon adding 3 M methanol into 0.1 M KOH electrolyte using the i-t technique. The durability of different samples were measured via chronoamperometric measurements in 0.1 M KOH with a rotation speed of 1,600 rpm.

Tafel slopes were obtained according to the Tafel equation:

$$\eta = a + b \log j \quad (5)$$

where  $\eta$  was the overpotential,  $j$  was the measured current density, and  $b$  was the Tafel slope. The electrochemical impedance spectroscopy (EIS) measurements were carried out in a frequency range of 0.01 Hz-100 KHz. The durability of different samples were measured via chronoamperometric measurements at 1,600 rpm in 0.1 M KOH.

The electrochemical surface areas (ECSA) values of different catalysts were determined by measuring the capacitive current associated with double-layer charging from the scan-rate dependence of CVs. The ECSA was measured on the same working electrode and electrolyte (0.1 M KOH). The potential window of CVs was 1.10–1.15 V vs. RHE, and the scan rates were 2, 4, 6, 8, and 10 mV/s. The double layer capacitance ( $C_{dl}$ ) was estimated by plotting the current density at 1.14V vs. RHE against the scan rate. The slope is twice of  $C_{dl}$ .

## 4. Simulation methods and computational modeling

### 4.1 Computational method.

The spin-polarized first-principle calculations were performed using the all-electron code Fritz-Haber Institute ab-initio molecules simulations package (FHI-aims).<sup>1</sup> The exchange-correlation potentials were treated by the generalized gradient approximation (GGA) developed by Perdew, Burke, and Ernzerhof (PBE).<sup>2, 3</sup> The current work employs the armchair (6, 6) single-walled carbon nanotube (CNT). At least 10 Å of vacuum layer are exposed to the direction perpendicular to the CNT axis. The B-doped FeN<sub>4</sub>/CNT supercell has a hexagonal lattice with x, y = 20.00 Å and z = 14.76 Å. The Brillion zone was sampled by an appropriate  $\Gamma$ -centered Monkhorst-Pack grid with a density of at least 0.03 Å<sup>-1</sup>.<sup>4</sup> All geometrical structures were fully relaxed to its ground state until the charge density and the total energy were below of 10<sup>-4</sup> eV/Å<sup>3</sup> and 10<sup>-5</sup> eV, respectively. To account for the weak van der Waals interaction, the functionals were augmented by the Tkatchenko and Scheffler scheme.<sup>5, 6</sup>

### 4.2 Formation energy

We compared formation energies of various possible models. Single B dopant could be generally classified into three different types, depending on the local chemical environment of carbon in the system: isolated B far away from FeN<sub>4</sub> moiety (B<sub>iso</sub>), B in a pentatomic ring bonded with FeN<sub>4</sub> moiety (B<sub>pen</sub>), B in a hexatomic ring bonded with FeN<sub>4</sub> moiety (B<sub>hex</sub>). With increasing B doping concentration, the situation of double B dopants incorporation of “Fe-porphyrin” into CNTs had been considered, affecting on the catalytic activity and electrical conducting of the system: two adjacent B dopants in a pentatomic or hexatomic ring (B<sub>2</sub>-adj-pen, B<sub>2</sub>-adj-hex), two opposite B dopants in different pentatomic or hexatomic rings (B<sub>2</sub>-opp-pen, B<sub>2</sub>-opp-hex), two adjacent B dopants bonded with the same N (B<sub>2</sub>-adj-N) and two interval B dopants in different rings (B<sub>2</sub>-pen-hex).

The formation energy ( $E_f$ )<sup>7</sup> of various B-doped FeN<sub>4</sub>/CNTs are calculated for comparing the relative stability of different B doped FeN<sub>4</sub>/CNT systems by the equation of

$$E_f = E_{tot}(B_C) - E_{tot} + \sum_i n_i \mu_i \quad (6)$$

where,  $E_{tot}(B_C)$  was the total energy of the supercell containing B substitutional carbon defects,  $E_{tot}$  was the total energy of the supercell without defects,  $n_i$  stood for the number of constituent element i being added/removed from the FeN<sub>4</sub>/CNT supercell,  $\mu_i$  referred to the atomic chemical potential,  $E_{VBM}$  represented the valence band maximum (VBM) energy of the perfect supercell,  $E_F$  meant the Fermi energy measured from the VBM, varying in the range of the band gap ( $E_g$ ), and  $\Delta V$  was the potential difference between the doped system and FeN<sub>4</sub>/CNT supercell.

#### 4.3 Gibbs free energy of each ORR steps

In alkaline media the overall ORR could be expressed as:

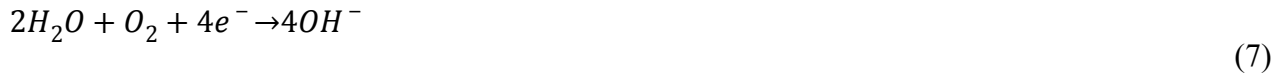

Since the ORR on FeN<sub>4</sub>/CNT proceeded mainly along four-electron processes, we thus explored the reaction via four-electron pathways. The elementary reaction steps were listed as below:

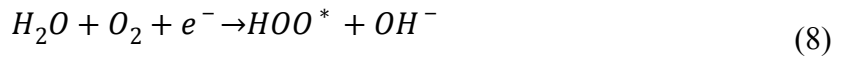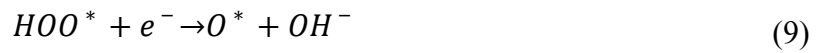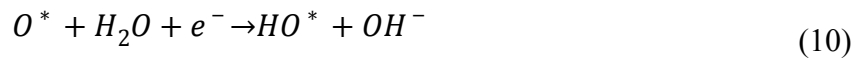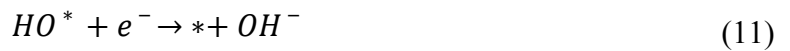

where \* represented an adsorption site. To quantitatively access the activity of the B-doped systems, we calculated the adsorption energies of ORR intermediates following the approach of Nørskov et al:

$$\Delta E_{HOO*} = E_{HOO*} - E_* - [2E_{H_2O}(l) - 3/2E_{H_2}(g)] \quad (12)$$

$$\Delta E_{HO*} = E_{HO*} - E_* - [E_{H_2O}(l) - 1/2E_{H_2}(g)] \quad (13)$$

$$\Delta E_{O*} = E_{O*} - E_* - [E_{H_2O} - E_{H_2}] \quad (14)$$

where, for example,  $E_{O*}$  denoted the total energy of an oxygen atom adsorbed on the catalyst obtained by the calculations,  $H_2O$  and  $H_2$  both referred to gas phases. To convert the adsorption energy at zero temperature into the adsorption Gibbs free energy at the room temperature (T) and standard pressure ( $p^0$ ), the electrode potential (U), entropy change ( $\Delta S$ ) and zero-point energy corrections ( $\Delta ZPE$ ) to the adsorption energy together with the solvation correction ( $\Delta G_{sol} + \Delta G_{PH}$ ) were considered. Herein, the change in Gibbs free energy ( $\Delta G$ ) for each reaction step of ORR could be given by the equation:

$$\Delta G = \Delta E + \Delta ZPE - T\Delta S + ne(U - U_0) + \Delta G_{sol} + \Delta G_{PH} \quad (15)$$

By setting the reference potential to be the standard hydrogen electrode, the free energy of  $1/2H_2$  could be used to replace that of  $(OH^-e^-)$ . The free energy of  $O_2$  was obtained from the reaction  $2H_2O \rightarrow O_2 + 2H_2$  for which the free energy change is 4.92 eV. And a solvation correction with energy equals to -0.28 eV, +0.07 eV and -0.22 eV were applied to  $E_{HO*}$ ,  $E_{O*}$  and  $E_{HOO*}$  respectively. Therefore, for ORR intermediates, the adsorption Gibbs free energies could be expressed as following:

$$\Delta G_{HOO*} = \Delta E_{HOO*} + \Delta ZPE - T\Delta S - 0.22 + 0.0591 \times PH - neU \quad (16)$$

$$\Delta G_{HO*} = \Delta E_{HO*} + \Delta ZPE - T\Delta S - 0.28 + 0.0591 \times PH - neU \quad (17)$$

$$\Delta G_{O*} = \Delta E_{O*} + \Delta ZPE - T\Delta S + 0.07 + 0.0591 \times PH - neU \quad (18)$$

where, T was the room temperature (300K), entropy changes ( $\Delta S$ ) and zero point energies ( $\Delta ZPE$ ) were employing as implemented in prior works and tabulated values.<sup>8,9</sup>

Through the DFT calculation, we carefully calculated the relationship of the boron-doped with the d-band center with the equation:

$$E_{d - band\ center} = \frac{\int_{-\infty}^{E_F} E \cdot PDOS(E) dE}{\int_{-\infty}^{E_F} PDOS(E) dE} \quad (19)$$

**5. Aqueous zinc-air battery assembly:** All electrodes were directly used as the air cathodes, which were coated Fe<sub>SA</sub>/B,N-CNT and Pt/C+IrO<sub>2</sub> on Nickel foam with the loading 3 mg cm<sup>-2</sup>, and zinc plates were polished to be used as the anodes. Rechargeable aqueous zinc-air batteries were prepared with addition of 0.2 M Zn(CH<sub>3</sub>COO)<sub>2</sub> into the 6 M KOH electrolyte.

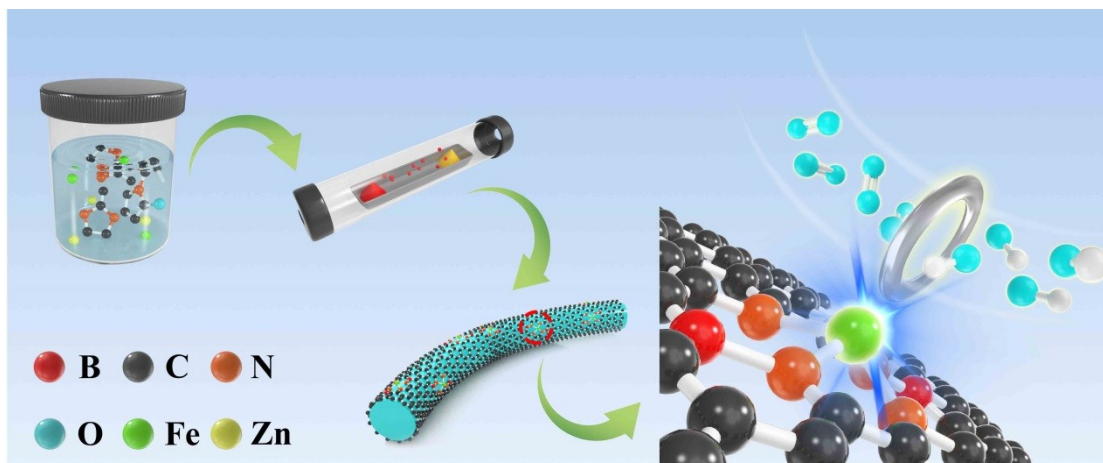

**Fig. S1.** Schematic procedure for the synthesis of Fe<sub>SA</sub>/B,N-CNT.

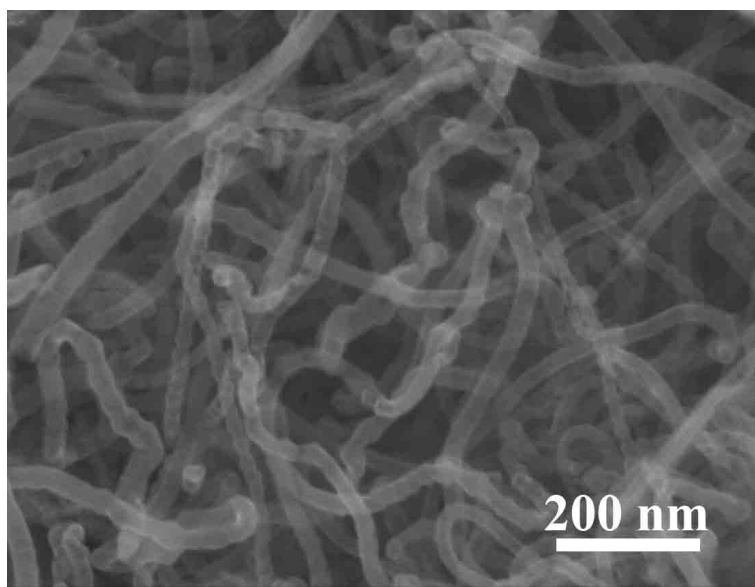

**Fig. S2.** SEM image of Fe<sub>SA</sub>/B,N-CNT.

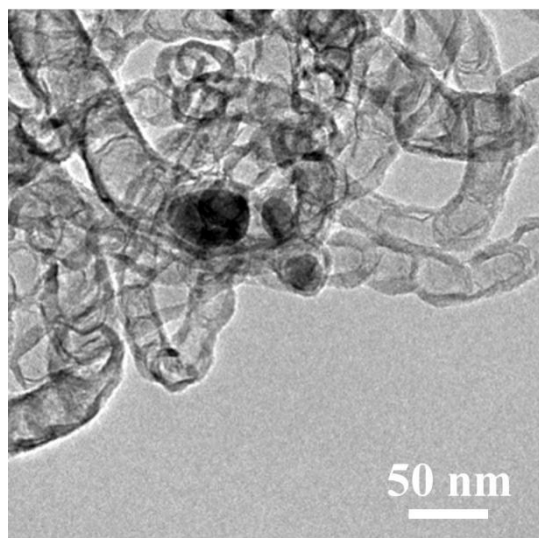

**Fig. S3.** TEM image of Fe<sub>NP</sub>/N-CNT, in which iron-based particles are encapsulated either at the tip or inside of carbon nanotubes.

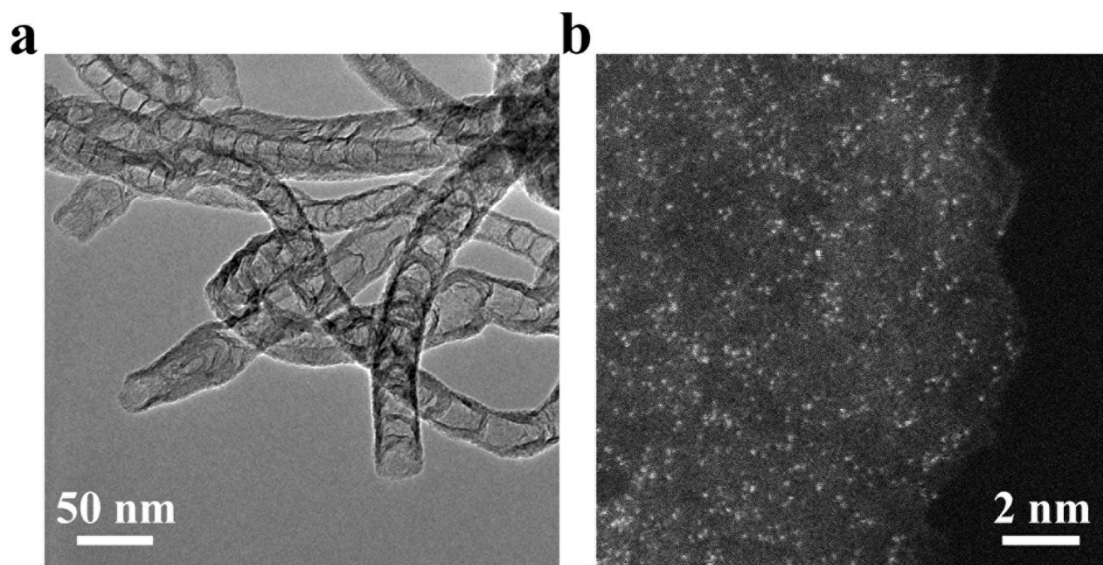

**Fig. S4.** TEM image and HAADF-STEM image of  $\text{Fe}_{\text{SA}}/\text{N-CNT}$ .  $\text{Fe}_{\text{SA}}/\text{N-CNT}$  exhibits the nanotube morphology without Fe aggregation. A large number of isolated bright dots representing single Fe atoms uniformly disperse on the carbon support.

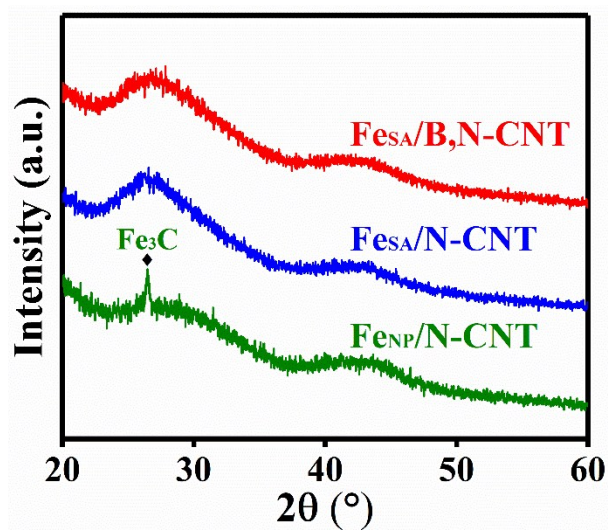

**Fig. S5.** XRD patterns of different samples. The results show no distinct differences between Fe<sub>SA</sub>/B,N-CNT and Fe<sub>SA</sub>/N-CNT, with two broad peaks assignable to the (002) and (101) planes of graphitic carbon. Notably, no peaks related to metallic Fe or other Fe species are observed. As for Fe<sub>NP</sub>/N-CNT, it exhibits well-defined diffraction peaks associated with Fe-based carbides.

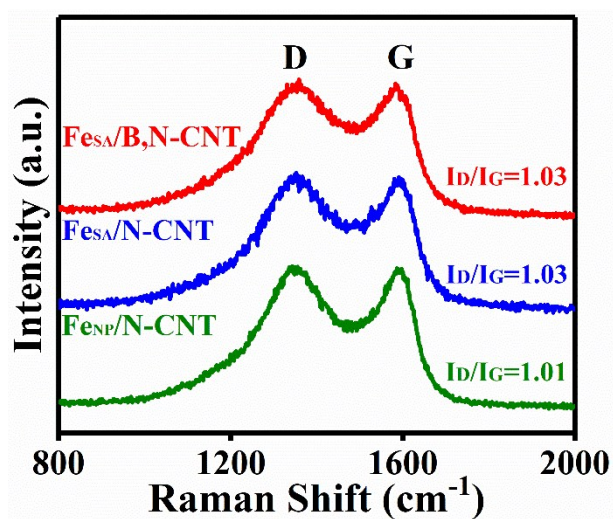

**Fig. S6.** Raman spectra of different samples. The D band (1360 cm<sup>-1</sup>) and G band (1590 cm<sup>-1</sup>) provide information on the disorder and crystallinity of carbon materials, respectively. Fe<sub>NP</sub>/N-CNT shows the lowest I<sub>D</sub>/I<sub>G</sub> value of 1.01. As for catalysts with single-atom dispersed Fe, the I<sub>D</sub>/I<sub>G</sub> exhibits the same value of 1.03.

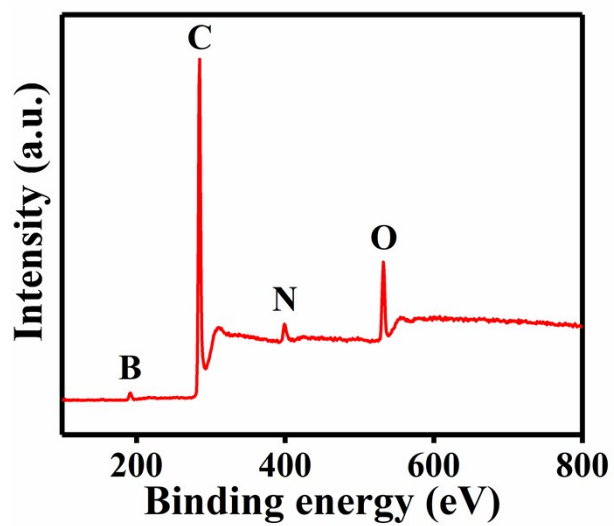

**Fig. S7.** XPS spectrum of  $\text{Fe}_{\text{SA}}/\text{B,N-CNT}$ . The survey scan indicates the presence of boron, carbon, nitrogen, and oxygen.

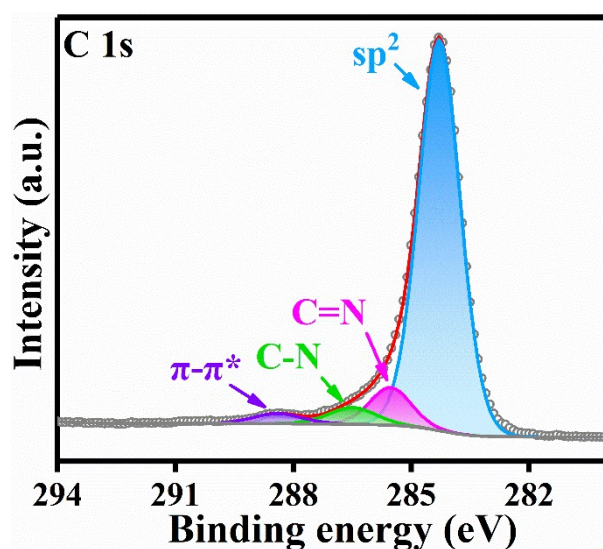

**Fig. S8.** High-resolution XPS spectra of C 1s of Fe<sub>SA</sub>/B,N-CNT. Four forms of carbon are observed including sp<sup>2</sup> at ~284.3 eV, C=N at ~285.5 eV, C-N at ~286.5 eV, and π-π\* at ~288.4 eV.

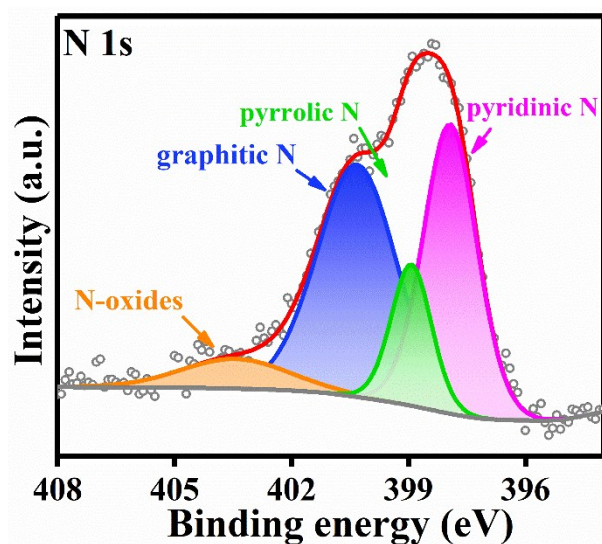

**Fig. S9.** High-resolution XPS spectrum of N 1s of Fe<sub>SA</sub>/B,N-CNT. Four forms of nitrogen are observed including pyridinic N at ~398.1 eV, pyrrolic N at ~398.9 eV, graphitic N at ~400.4 eV, and N-oxides at ~403.6 eV.

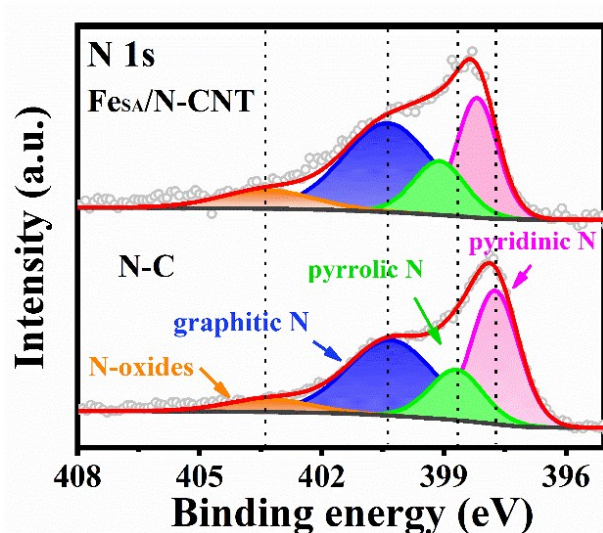

**Fig. S10.** High-resolution N 1s X-ray photoelectron spectra of the Fe<sub>SA</sub>/N-CNT and N-C. The N 1s spectra of N-C were deconvoluted into four peaks, assignable to the pyridinic N (397.8 eV), pyrrolic N (398.7 eV), graphitic N (400.4 eV), and pyridine N-oxides (403.6 eV), respectively. Once Fe was present in the catalyst, both pyridinic N and pyrrolic N shifted to higher binding energy of 398.1 and 398.9 eV, respectively, while no discernible peak shift was observed in graphitic N or pyridine N-oxides. This suggest strong chemical bond forming between Fe and pyridinic/pyrrolic N with a high electronegativity, leading to partial electron migration from Fe to pyridinic/pyrrolic N.

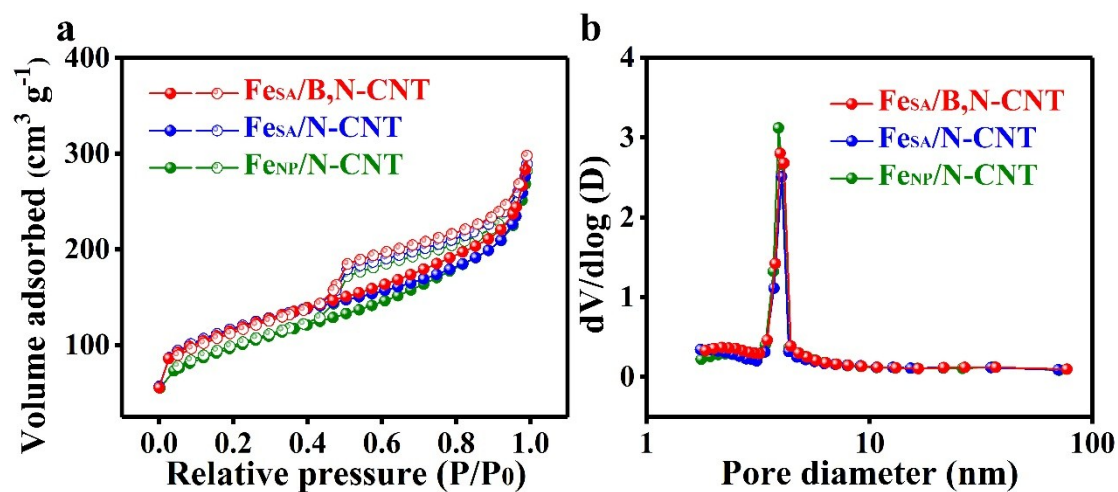

**Fig. S11.** (a) N<sub>2</sub> sorption isotherms and (b) pore size distribution curves of different samples. The specific surface area for each sample was calculated to be 399 m<sup>2</sup> g<sup>-1</sup> for Fe<sub>SA</sub>/B,N-CNT, 397 m<sup>2</sup> g<sup>-1</sup> for Fe<sub>SA</sub>/N-CNT, and 341 m<sup>2</sup> g<sup>-1</sup> for Fe<sub>NP</sub>/N-CNT. The typical mesopores centered at around 4 nm could facilitate the mass transfer during ORR process.

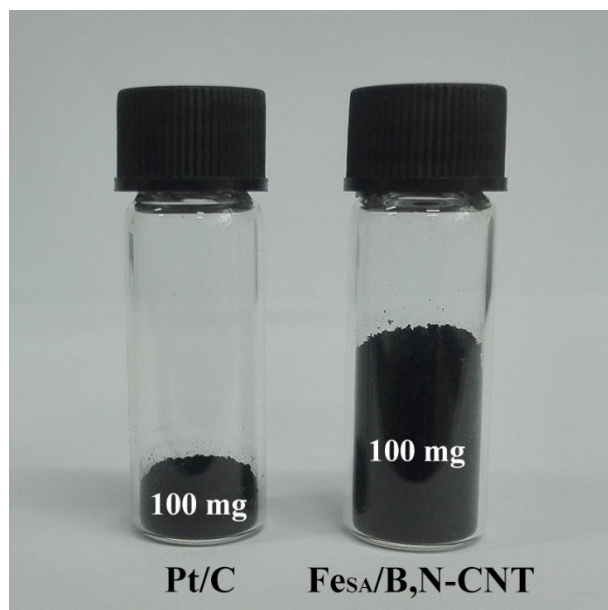

**Fig. S12.** Photographs of  $\text{Fe}_{\text{SA}}/\text{B,N-CNT}$  (100 mg, right) and commercial Pt/C (20 wt. % Pt, 100 mg, left) in vials.  $\text{Fe}_{\text{SA}}/\text{B,N-CNT}$  shows low volumetric density compared to commercial Pt/C catalyst.

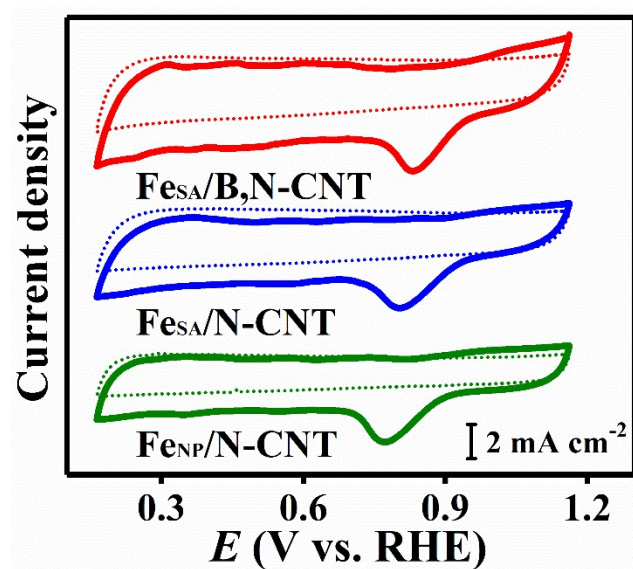

**Fig. S13.** CV curves of different samples in O<sub>2</sub>-saturated (solid line) or N<sub>2</sub>-saturated (dash line) 0.1 M KOH. No redox peak was observed when the solution was saturated with N<sub>2</sub>. On the contrary, if the gas in the solution was replaced with O<sub>2</sub>, an obvious onset potential was observed at ~1.06 V vs. RHE for Fe<sub>SA</sub>/B,N-CNT, suggesting the superior ORR performance.

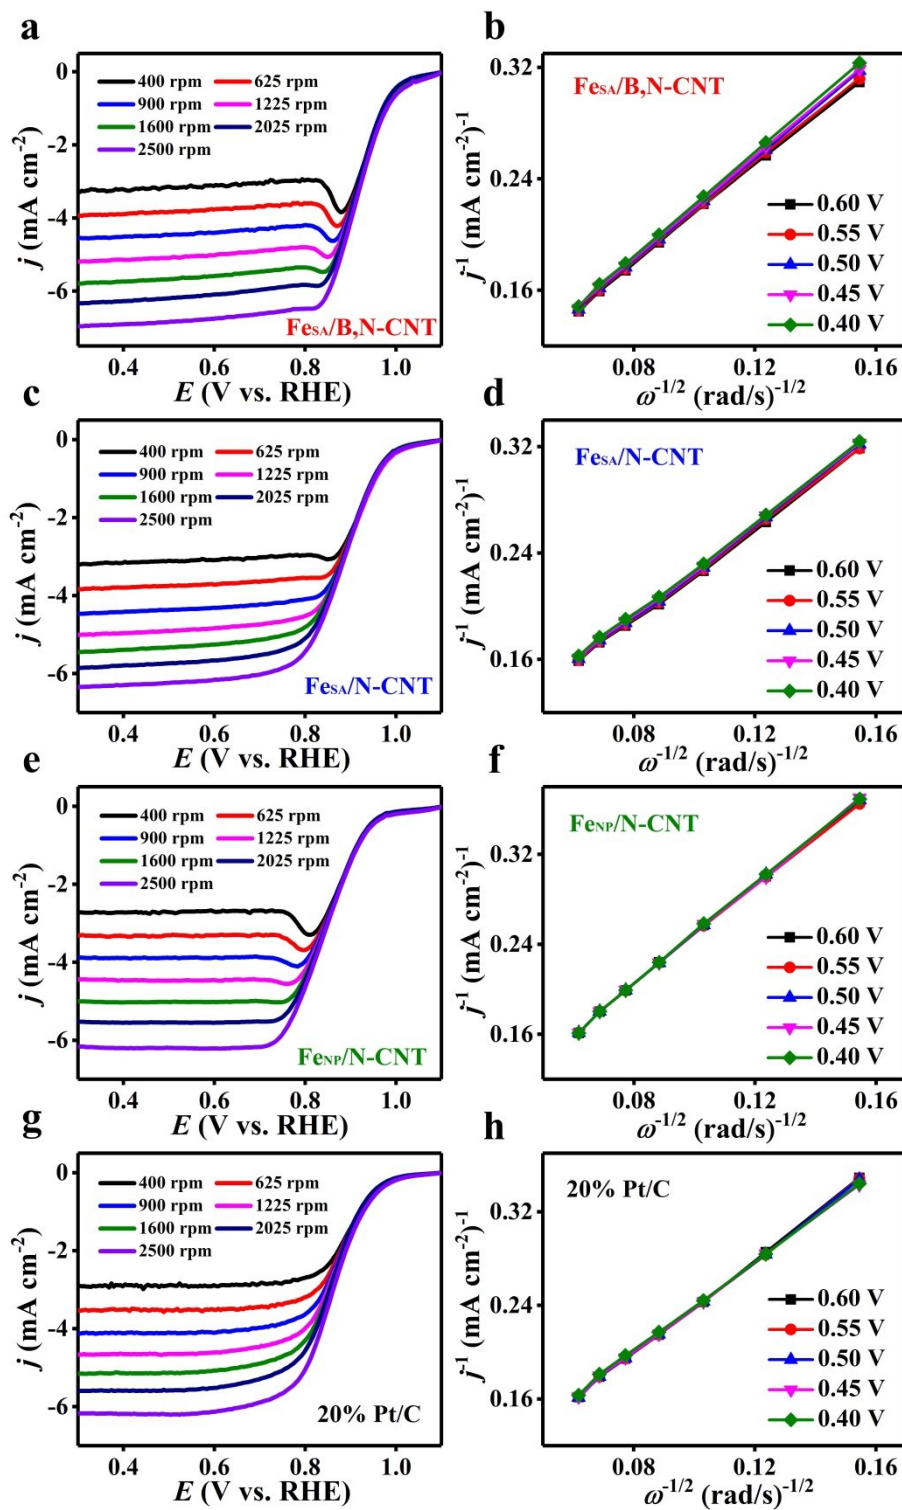

**Fig. S14.** LSV curves at different rotation speeds and the corresponding K-L plots at different potentials of (a,b) Fe<sub>SA</sub>/B,N-CNT, (c,d) Fe<sub>SA</sub>/N-CNT, (e,f) Fe<sub>NP</sub>/N-CNT and (g,h) Pt/C.

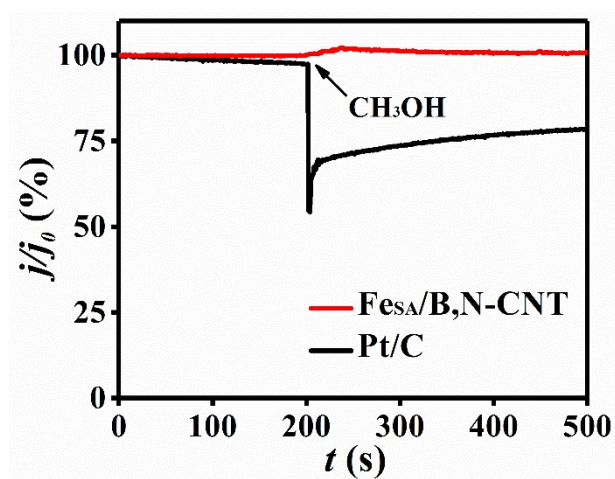

**Fig. S15.** Methanol resistance in O<sub>2</sub>-saturated 0.1 M KOH tests without and with CH<sub>3</sub>OH.

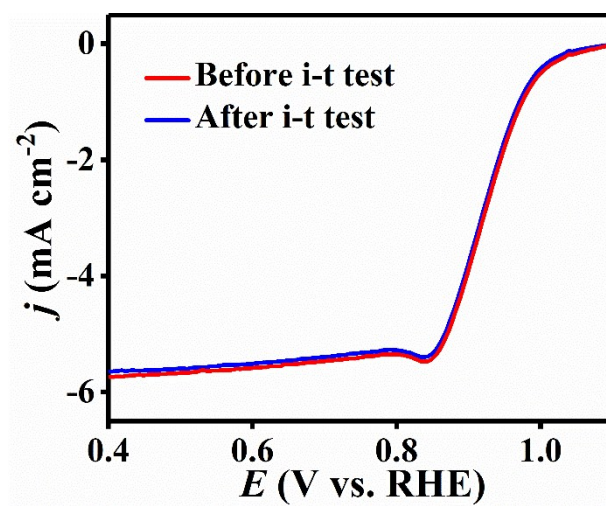

**Fig. S16.** ORR LSV curves of Fe<sub>SA</sub>/B,N-CNT before and after 20000 s i-t test.

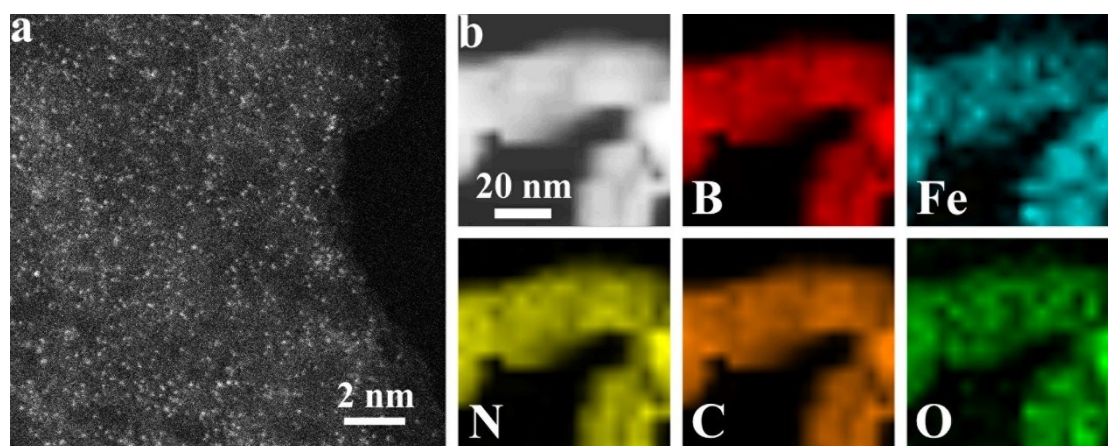

**Fig. S17.** (a) AC HAADF-STEM image and (b) HRTEM image and corresponding element mapping of Fe<sub>SA</sub>/B,N-CNT after durability test, demonstrating the atomically dispersed Fe atoms remain unchanged.

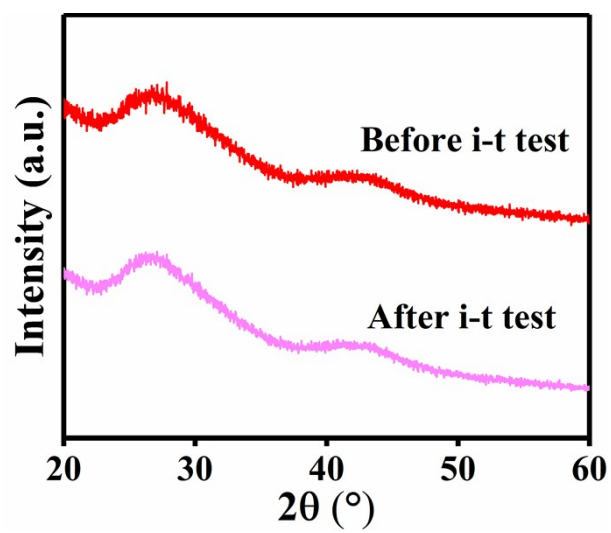

**Fig. S18.** XRD spectrum of the  $\text{Fe}_{\text{SA}}/\text{B}_3\text{N}$ -CNT after test.

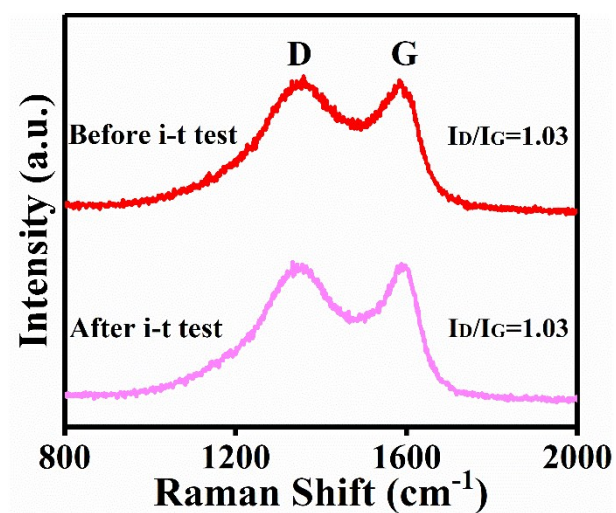

**Fig. S19.** Raman spectrum of the Fe<sub>SA</sub>/B<sub>3</sub>N-CNT after durability test.  $I_D/I_G$  is the intensity ratio of the D peak to the G peak.

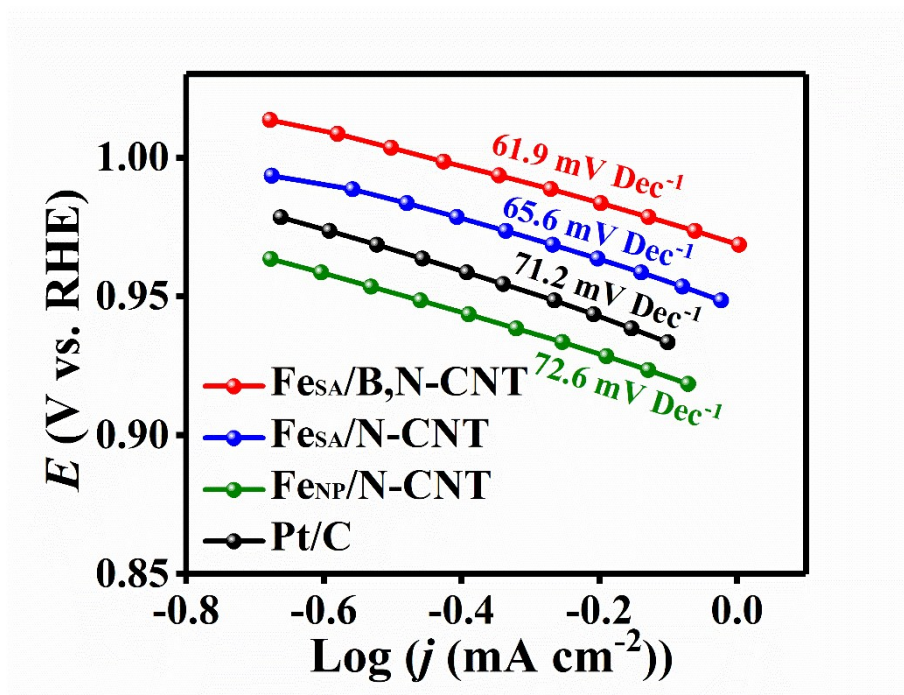

**Fig. S20.** ORR Tafel plots derived from the corresponding LSV curves. The much smaller Tafel slope of  $\text{Fe}_{\text{SA}}/\text{B,N-CNT}$  (61.9 mV/dec) compared to other samples indicates a more favorable reaction kinetics.

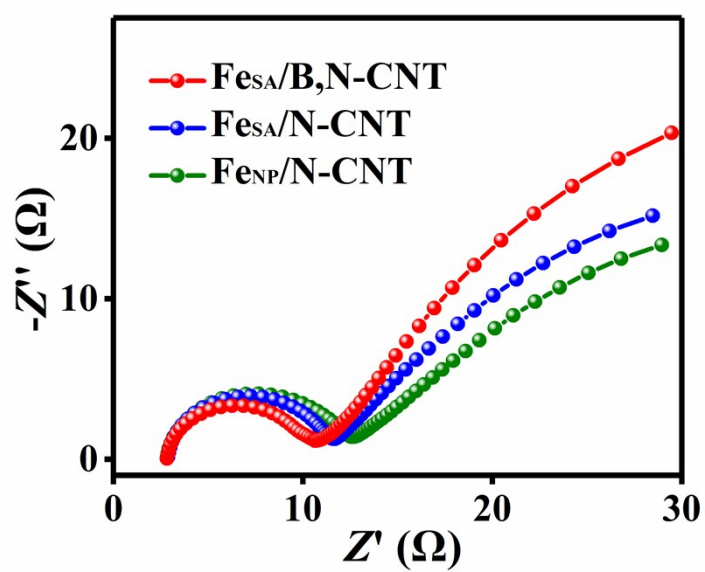

**Fig. S21.** EIS spectra of different samples.  $\text{Fe}_{\text{SA}}/\text{B,N-CNT}$  displays the smallest diameter of the semicircle and the largest slope among all the samples, confirming its fastest electron transport kinetics and ion diffusion rate.

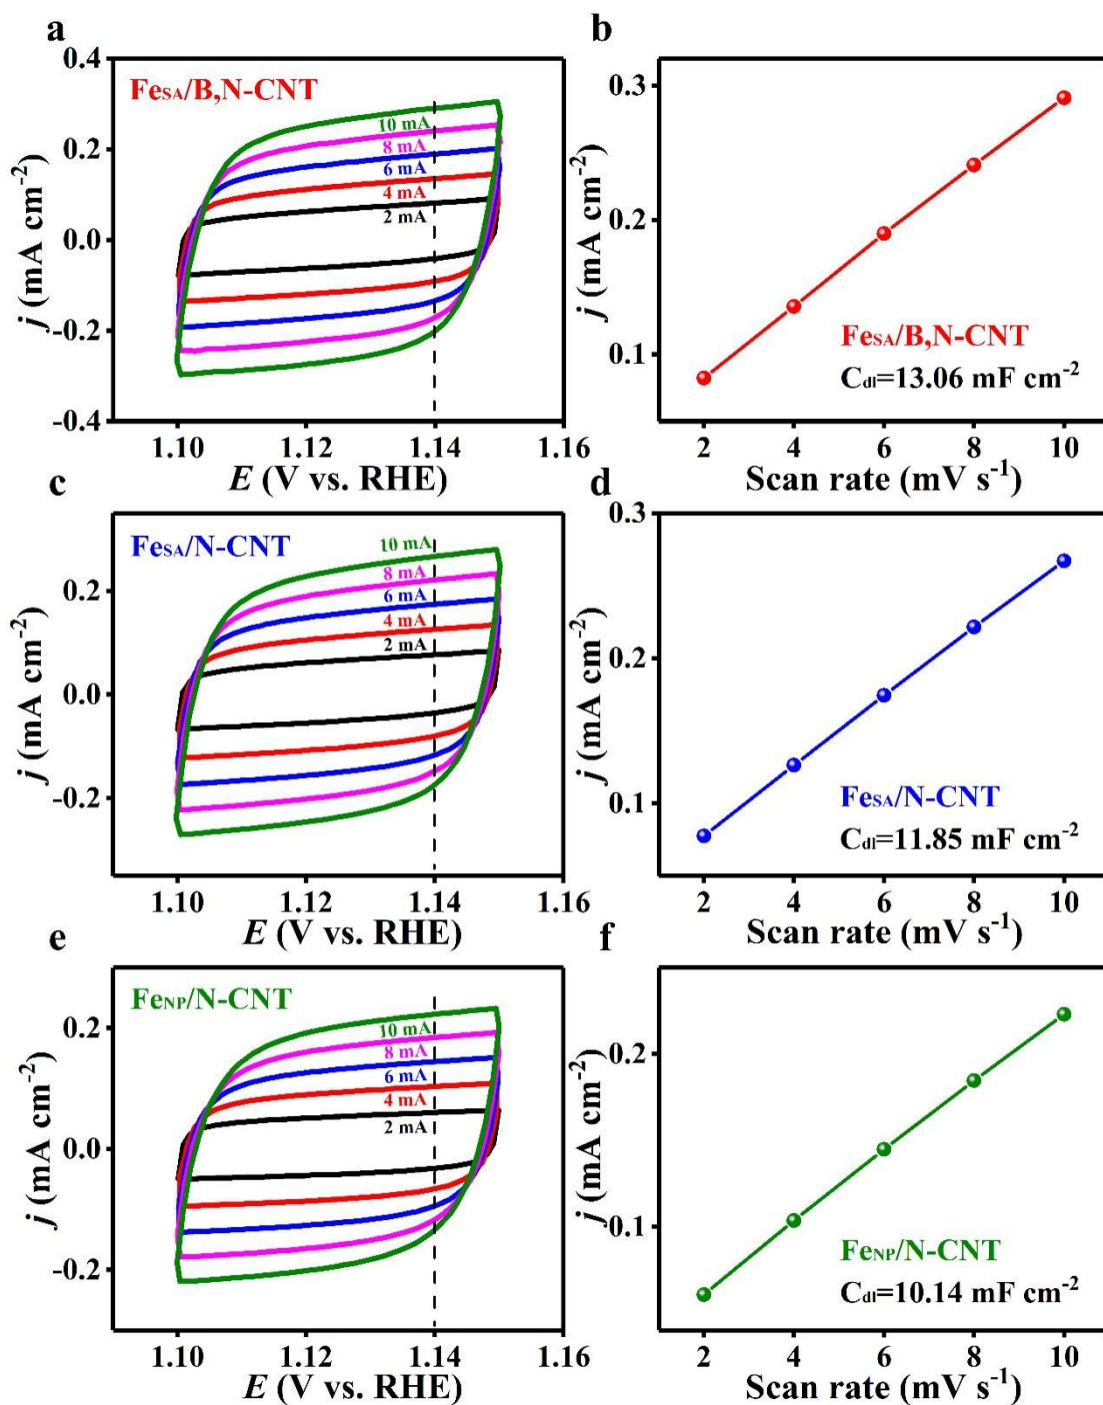

**Fig. S22.** Cyclic voltammetry curves of different samples in 2 M KCl solution and a plot of the current density at 1.14 V vs. the scan rate of (a,b) Fe<sub>SA</sub>/B,N-CNT, (c,d) Fe<sub>SA</sub>/N-CNT, and (e,f) Fe<sub>NP</sub>/N-CNT. The double layer capacitance  $C_{dl}$  increases in the order of Fe<sub>NP</sub>/N-CNT (10.14 mF cm<sup>-2</sup>) < Fe<sub>SA</sub>/N-CNT (11.85 mF cm<sup>-2</sup>) < Fe<sub>SA</sub>/B,N-CNT (13.06 mF cm<sup>-2</sup>).

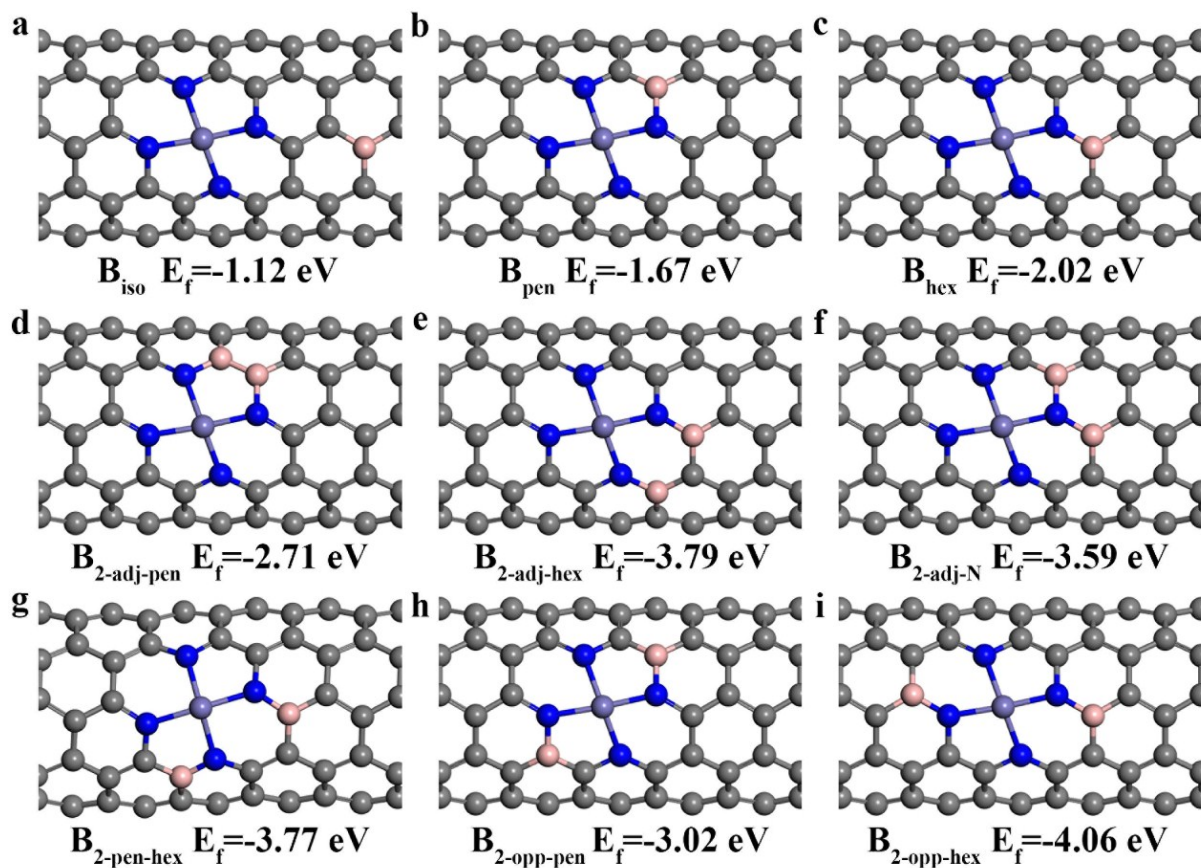

**Fig. S23.** The configurations and formation energies ( $E_f$ ) of various possible B-doped  $\text{FeN}_4$  active sites. A pentatomic ring consists of one Fe atom, two N atoms and two C atoms, the Fe and two N atoms together with three C atom compose a hexatomic ring. Purple, blue, pink, and grey represent Fe, N, B, and C atoms, respectively.

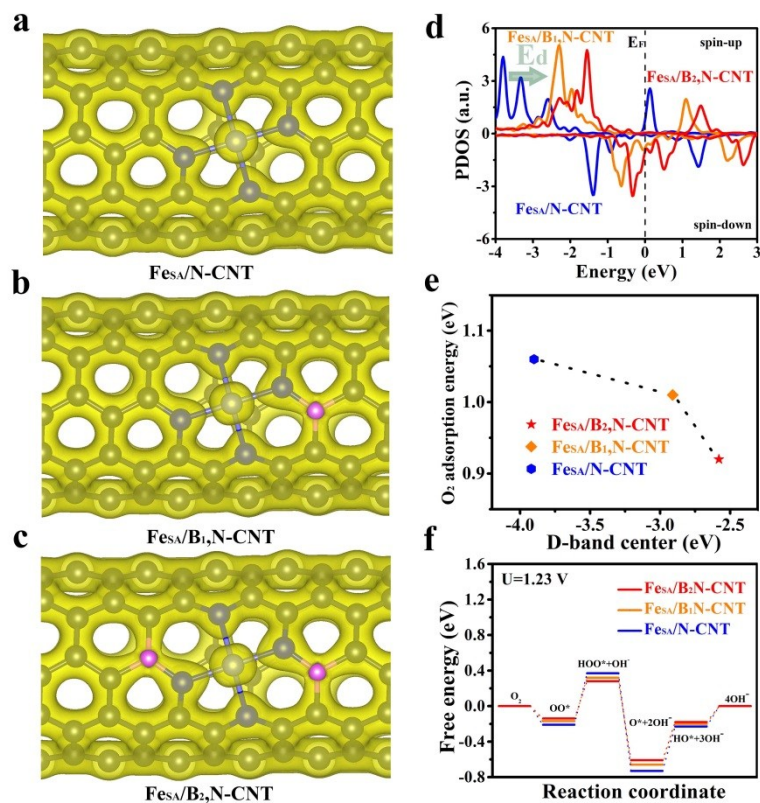

**Fig. S24.** The structure of (a) Fe<sub>SA</sub>/N-CNT, (b) Fe<sub>SA</sub>/B<sub>1</sub>N-CNT, and (c) Fe<sub>SA</sub>/B<sub>2</sub>N-CNT. (d) The PDOS of Fe 3d band of the different catalysts. (e) The relation between d-band center and the O<sub>2</sub> adsorption of different catalysts. (f) The free energy of the catalysts at the equilibrium potential of U = 1.23 V.

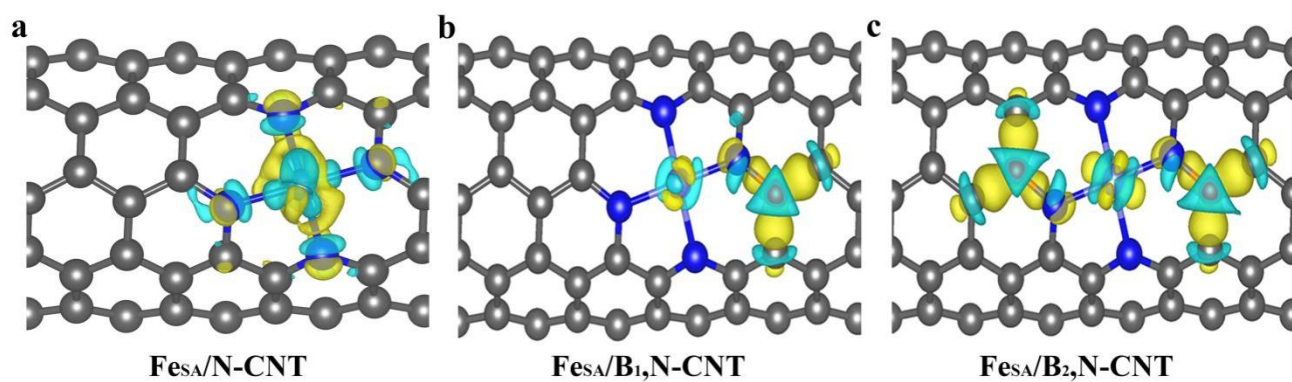

**Fig. S25.** The charge-density variation wave of the Fe<sub>SA</sub>/N-CNT, Fe<sub>SA</sub>/B<sub>1</sub>,N-CNT and Fe<sub>SA</sub>/B<sub>2</sub>,N-CNT. Light blue area represented charge density decrease ( $\Delta\rho < 0$ ) and yellow area denoted charge density increase ( $\Delta\rho > 0$ ). Purple, blue, pink, and grey represent Fe, N, B, and C atoms, respectively.

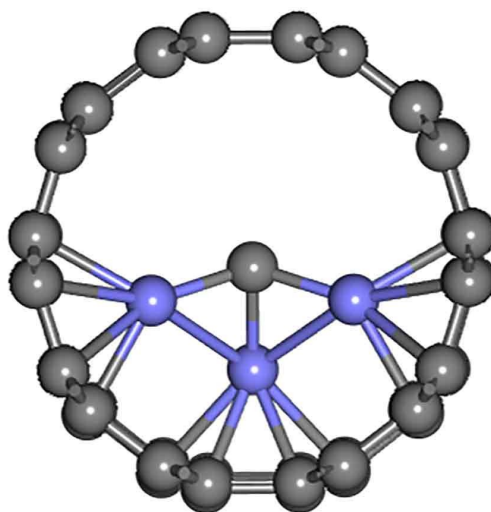

**Fe<sub>NP</sub>/N-CNT**

**Fig. S26.** The optimized structure of Fe<sub>NP</sub>/N-CNT. Purple, blue, and grey represent Fe, N, and C atoms, respectively.

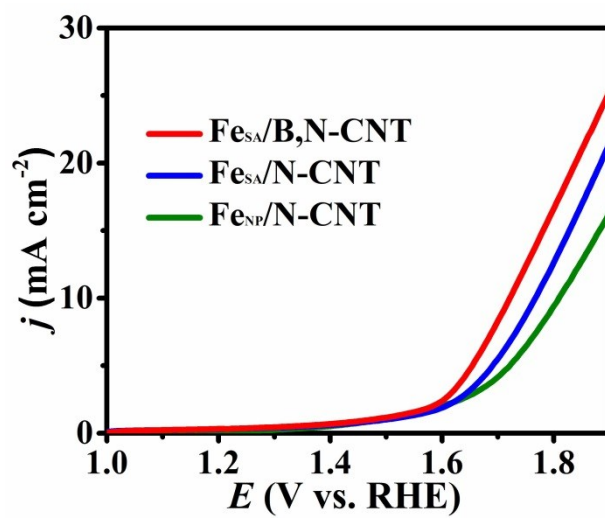

**Fig. S27.** Linear sweep voltammetry OER curves of  $\text{Fe}_{\text{SA}}/\text{B,N-CNT}$ ,  $\text{Fe}_{\text{SA}}/\text{N-CNT}$  and  $\text{Fe}_{\text{NP}}/\text{N-CNT}$ .

## 6. Supplementary Tables

**Table S1.** Elemental compositions (C, O, N, and B) obtained by XPS spectroscopy, and Fe contents measured by ICP-OES.

|                                | C(at%) | O(at%) | N(at%) | B(at%) | Fe(at%) |
|--------------------------------|--------|--------|--------|--------|---------|
| <b>Fe<sub>SA</sub>/B,N-CNT</b> | 85.55  | 6.99   | 3.68   | 3.68   | 0.10    |
| <b>Fe<sub>SA</sub>/N-CNT</b>   | 90.06  | 5.92   | 3.86   | NA     | 0.16    |
| <b>Fe<sub>NP</sub>/N-CNT</b>   | 88.88  | 6.68   | 3.99   | NA     | 0.44    |

**Table S2.** Comparison of ORR activity of various non-precious metal catalysts in 0.1 M KOH.

| Catalyst                                 | E <sub>onset</sub> vs.<br>RHE (V) | E <sub>1/2</sub> vs.<br>RHE(V) | J <sub>k</sub>   <sub>V=0.85 V</sub><br>(mA cm <sup>-2</sup> ) | K <sub>tafel</sub><br>(mV dec <sup>-1</sup> ) | Ref.             |
|------------------------------------------|-----------------------------------|--------------------------------|----------------------------------------------------------------|-----------------------------------------------|------------------|
| <b>Fe<sub>SA</sub>/B,N-CNT</b>           | <b>1.07</b>                       | <b>0.933</b>                   | <b>62.57</b>                                                   | <b>61.9</b>                                   | <b>This work</b> |
| <b>Fe<sub>SA</sub>/N-CNT</b>             | <b>1.04</b>                       | <b>0.890</b>                   | <b>13.17</b>                                                   | <b>65.6</b>                                   | <b>This work</b> |
| <b>Fe-ISAs/CN</b>                        | <b>0.986</b>                      | <b>0.900</b>                   | <b>37.85</b>                                                   | <b>58</b>                                     | <b>10</b>        |
| <b>SA-Fe-HPC</b>                         | <b>/</b>                          | <b>0.890</b>                   | <b>3.72</b>                                                    | <b>49</b>                                     | <b>11</b>        |
| <b>FeCl<sub>1</sub>N<sub>4</sub>/CNS</b> | <b>/</b>                          | <b>0.921</b>                   | <b>41.11</b>                                                   | <b>51</b>                                     | <b>12</b>        |
| <b>N-GCNT/FeCo</b>                       | <b>1.03</b>                       | <b>0.920</b>                   | <b>/</b>                                                       | <b>66.8</b>                                   | <b>13</b>        |

|                                              |              |              |                               |             |           |
|----------------------------------------------|--------------|--------------|-------------------------------|-------------|-----------|
| <b>Fe-ISA/SNC</b>                            | <b>/</b>     | <b>0.896</b> | <b>100.7</b>                  | <b>44</b>   | <b>14</b> |
| <b>Fe-N<sub>4</sub> SAs/NPC</b>              | <b>0.972</b> | <b>0.885</b> | <b>/</b>                      | <b>91</b>   | <b>15</b> |
| <b>Fe<sub>SA</sub>-N-C</b>                   | <b>/</b>     | <b>0.891</b> | <b>23.27</b>                  | <b>/</b>    | <b>16</b> |
| <b>FeCo-ISAs/CN</b>                          | <b>0.995</b> | <b>0.920</b> | <b>31.1<sub> 0.88 V</sub></b> | <b>57</b>   | <b>17</b> |
| <b>Fe<sub>3</sub>C-Fe<sub>3</sub>N/C-900</b> | <b>/</b>     | <b>0.881</b> | <b>/</b>                      | <b>/</b>    | <b>18</b> |
| <b>BCN-FNHs</b>                              | <b>0.886</b> | <b>0.861</b> | <b>/</b>                      | <b>91.2</b> | <b>19</b> |
| <b>Fe-N/C-800</b>                            | <b>0.98</b>  | <b>0.81</b>  | <b>/</b>                      | <b>59</b>   | <b>20</b> |
| <b>CNT/PC</b>                                | <b>/</b>     | <b>0.88</b>  | <b>2.4<sub> 0.9 V</sub></b>   | <b>/</b>    | <b>21</b> |
| <b>Fe@C-FeNC-2</b>                           | <b>1.00</b>  | <b>0.899</b> | <b>/</b>                      | <b>68</b>   | <b>22</b> |
| <b>CNT/HDC-1000</b>                          | <b>0.92</b>  | <b>0.82</b>  | <b>8.3<sub> 0.8 V</sub></b>   | <b>65.1</b> | <b>23</b> |
| <b>FePhen@MOFArNH<sub>3</sub></b>            | <b>1.03</b>  | <b>0.86</b>  | <b>/</b>                      | <b>/</b>    | <b>24</b> |
| <b>NCNTFs</b>                                | <b>/</b>     | <b>0.87</b>  | <b>/</b>                      | <b>64</b>   | <b>25</b> |
| <b>BN-GQD/G-30</b>                           | <b>/</b>     | <b>0.7</b>   | <b>11.1</b>                   | <b>/</b>    | <b>26</b> |
| <b>pCNT@Fe<sub>1.5</sub>@GL</b>              | <b>/</b>     | <b>0.867</b> | <b>/</b>                      | <b>65.2</b> | <b>27</b> |
| <b>NCMT-1000 (3D)</b>                        | <b>1.05</b>  | <b>0.89</b>  | <b>/</b>                      | <b>/</b>    | <b>28</b> |
| <b>FePc-Py-CNTs</b>                          | <b>/</b>     | <b>0.915</b> | <b>/</b>                      | <b>27</b>   | <b>29</b> |

|                                      |              |              |                               |             |           |
|--------------------------------------|--------------|--------------|-------------------------------|-------------|-----------|
| <b>FeN<sub>x</sub>/C-700-20</b>      | <b>1.1</b>   | <b>0.9</b>   | <b>/</b>                      | <b>93</b>   | <b>30</b> |
| <b>Fe-N-CC</b>                       | <b>0.94</b>  | <b>0.83</b>  | <b>18.3<sub> 0.58 V</sub></b> | <b>/</b>    | <b>31</b> |
| <b>Fe-NMCSs</b>                      | <b>1.027</b> | <b>0.86</b>  | <b>/</b>                      | <b>/</b>    | <b>32</b> |
| <b>FeSAs/PTF-600</b>                 | <b>1.01</b>  | <b>0.87</b>  | <b>/</b>                      | <b>62</b>   | <b>33</b> |
| <b>Fe/N/G-0.25</b>                   | <b>0.98</b>  | <b>0.84</b>  | <b>/</b>                      | <b>90</b>   | <b>34</b> |
| <b>Fe<sub>3</sub>C/NCNTs/OBP-900</b> | <b>1.00</b>  | <b>0.89</b>  | <b>/</b>                      | <b>74.3</b> | <b>35</b> |
| <b>BNG-2.5-1000</b>                  | <b>1.01</b>  | <b>0.816</b> | <b>26.62</b>                  | <b>/</b>    | <b>36</b> |
| <b>IL-1-C</b>                        | <b>0.96</b>  | <b>0.87</b>  | <b>/</b>                      | <b>60</b>   | <b>37</b> |
| <b>Fe<sub>15</sub>-N-C1000</b>       | <b>0.99</b>  | <b>0.85</b>  | <b>/</b>                      | <b>62</b>   | <b>38</b> |
| <b>FePPyC-900</b>                    | <b>0.96</b>  | <b>0.877</b> | <b>/</b>                      | <b>95</b>   | <b>39</b> |
| <b>Fe/Fe<sub>3</sub>C@N-C-NaCl</b>   | <b>0.97</b>  | <b>0.869</b> | <b>/</b>                      | <b>67</b>   | <b>40</b> |
| <b>Fe-N/C-1/30</b>                   | <b>1.04</b>  | <b>0.895</b> | <b>/</b>                      | <b>/</b>    | <b>41</b> |
| <b>Meso/micro-PoPD</b>               | <b>/</b>     | <b>0.85</b>  | <b>4.23<sub> 0.8 V</sub></b>  | <b>/</b>    | <b>42</b> |
| <b>CNPs</b>                          | <b>1.03</b>  | <b>0.92</b>  | <b>/</b>                      | <b>/</b>    | <b>43</b> |
| <b>Fe<sub>3</sub>C@N-CNT</b>         | <b>0.95</b>  | <b>0.85</b>  | <b>/</b>                      | <b>78</b>   | <b>44</b> |
| <b>COP-TPP(Fe)@MOF-900</b>           | <b>0.99</b>  | <b>0.846</b> | <b>/</b>                      | <b>68</b>   | <b>45</b> |

|                               |              |              |                               |             |           |
|-------------------------------|--------------|--------------|-------------------------------|-------------|-----------|
| <b>SA-Fe/NG</b>               | <b>/</b>     | <b>0.88</b>  | <b>10</b>                     | <b>82</b>   | <b>46</b> |
| <b>FeNC-20-1000</b>           | <b>1.04</b>  | <b>0.88</b>  | <b>/</b>                      | <b>49</b>   | <b>47</b> |
| <b>N-Fe-MOF</b>               | <b>1.05</b>  | <b>0.88</b>  | <b>/</b>                      | <b>/</b>    | <b>48</b> |
| <b>SA-Fe-N-1.5-800</b>        | <b>/</b>     | <b>0.910</b> | <b>/</b>                      | <b>62</b>   | <b>49</b> |
| <b>25% Cu-N/C</b>             | <b>0.917</b> | <b>0.813</b> | <b>35.2<sub> 0.75 V</sub></b> | <b>45.8</b> | <b>50</b> |
| <b>Co SAs/N-C(900)</b>        | <b>/</b>     | <b>0.881</b> | <b>22<sub> 0.8 V</sub></b>    | <b>75</b>   | <b>51</b> |
| <b>Co-N<sub>x</sub>/C NRA</b> | <b>/</b>     | <b>0.877</b> | <b>/</b>                      | <b>66</b>   | <b>52</b> |
| <b>NC@Co-NGC DSNC</b>         | <b>/</b>     | <b>0.82</b>  | <b>12.8<sub> 0.71 V</sub></b> | <b>51</b>   | <b>53</b> |
| <b>ZIF-TAA-p</b>              | <b>0.98</b>  | <b>0.88</b>  | <b>/</b>                      | <b>/</b>    | <b>54</b> |
| <b>C-CZ-4-1000</b>            | <b>1.03</b>  | <b>0.887</b> | <b>/</b>                      | <b>49</b>   | <b>55</b> |
| <b>Co@MCM</b>                 | <b>0.95</b>  | <b>0.86</b>  | <b>/</b>                      | <b>96</b>   | <b>56</b> |
| <b>Co-ISAS/p-CN</b>           | <b>/</b>     | <b>0.838</b> | <b>5.1<sub> 0.83 V</sub></b>  | <b>61</b>   | <b>57</b> |
| <b>CuCo@NC</b>                | <b>0.96</b>  | <b>0.884</b> | <b>/</b>                      | <b>80</b>   | <b>58</b> |

**Table S3.** Free energy change ( $\Delta G$ ) for the 4-electron transfer processes during ORR at  $T = 298$  K,  $\text{PH} = 13$  and  $U = 0$  V.

| Elementary steps                                                                       | $\Delta G$                         |                                      |                                        |
|----------------------------------------------------------------------------------------|------------------------------------|--------------------------------------|----------------------------------------|
|                                                                                        | $\text{Fe}_{\text{NP}}/\text{CNT}$ | $\text{Fe}_{\text{SA}}/\text{N-CNT}$ | $\text{Fe}_{\text{SA}}/\text{B,N-CNT}$ |
| $* + \text{O}_2 \rightarrow \text{OO}^*$                                               | 5.22                               | 4.71                                 | 4.78                                   |
| $\text{OO}^* + \text{H}_2\text{O} + \text{e}^- \rightarrow \text{HOO}^* + \text{OH}^-$ | 4.85                               | 4.06                                 | 3.97                                   |
| $\text{HOO}^* + \text{e}^- \rightarrow \text{O}^* + \text{OH}^-$                       | 2.50                               | 1.73                                 | 1.85                                   |
| $\text{O}^* + \text{H}_2\text{O} + \text{e}^- \rightarrow \text{HO}^* + \text{OH}^-$   | 1.68                               | 1.00                                 | 1.05                                   |
| $\text{HO}^* + \text{e}^- \rightarrow * + \text{OH}^-$                                 | 0.00                               | 0.00                                 | 0.00                                   |

## References

- 1 V. Blum, R. Gehrke, F. Hanke, P. Havu, V. Havu, X. Ren, K. Reuter and M. Scheffler, *Comput. Phys. Commun.*, 2009, **180**, 2175-2196.
- 2 J. P. Perdew, K. Burke and M. Ernzerhof, *Phys. Rev. Lett.*, 1998, **77**, 3865-3868.
- 3 G. Kresse and D. Joubert, *Phys. Rev. B*, 1999, **59**, 1758-1775.
- 4 H. J. Monkhorst and J. D. Pack, *Phys. Rev. B*, 1976, **13**, 5188-5192.
- 5 A. Tkatchenko and M. Scheffler, *Phys. Rev. Lett.*, 2009, **102**, 073005.
- 6 V. G. Ruiz, W. Liu, E. Zojer, M. Scheffler and A. Tkatchenko, *Phys. Rev. Lett.*, 2012, **108**, 146103.
- 7 C. Freysoldt, B. Grabowski, T. Hickel, J. Neugebauer, G. Kresse, A. Janotti and C. G. V. D. Walle, *Rev. Mod. Phys.*, 2014, **86**, 253-305.
- 8 G. S. Karlberg, J. Rossmeisl and J. K. Nørskov, *Phys. Chem. Chem. Phys.*, 2007, **9**, 5158-5161.
- 9 A. Holewinski, J. C. Idrobo and S. Linic, *Nat. Chem.*, 2014, **6**, 828-834.
- 10 Y. Chen, S. Ji, Y. Wang, J. Dong, W. Chen, Z. Li, R. Shen, L. Zheng, Z. Zhuang and D. Wang, *Angew. Chem. Int. Ed.*, 2017, **129**, 6937-6941.
- 11 Z. P. Zhang, J. T. Sun, F. Wang and L. M. Dai, *Angew. Chem. Int. Ed.*, 2018, **57**, 9038-9043.
- 12 Y. H. Han, Y. G. Wang, R. R. Xu, W. X. Chen and Y. D. Li, *Energy Environ. Sci.*, 2018, **11**, 2348-2352.
- 13 S. Li, C. Cheng, X. Zhao, J. Schmidt and A. Thomas, *Angew. Chem. Int. Ed.*, 2018, **57**, 1856.
- 14 Q. Li, W. Chen, H. Xiao, Y. Gong, Z. Li, L. Zheng, X. Zheng, W. Yan, W. C. Cheong and R. Shen, *Adv. Mater.*, 2018, **30**, 1800588.
- 15 Y. Pan, S. Liu, K. Sun, X. Chen, B. Wang, K. Wu, X. Cao, W. C. Cheong, R. Shen and A. Han, *Angew. Chem. Int. Ed.*, 2018, **57**, 8614-8618.
- 16 H. L. Jiang, L. Jiao, G. Wan, R. Zhang, H. Zhou and S. H. Yu, *Angew. Chem. Int. Ed.*, 2018, **57**, 8525-8529.
- 17 D. Zhang, W. Chen, Z. Li, Y. Chen, L. Zheng, Y. Gong, Q. Li, R. Shen, Y. Han and W. C. Cheong, *Chem. Commun.*, 2018, **54**, 4274-4277.
- 18 H. Tan, Y. Li and J. Kim, *Adv. Sci.*, 2018, **5**, 1800120.

- 19 Y. Wenxiu, L. Xiangjian, Y. Xiaoyu, J. Jianbo and G. Shaojun, *J. Am. Chem. Soc.*, 2015, **137**, 1436.
- 20 W. H. Niu, L. G. Li, X. J. Liu, N. Wang, J. Liu, W. J. Zhou, Z. H. Tang and S. W. Chen, *J. Am. Chem. Soc.*, 2015, **137**, 5555-5562.
- 21 Y. J. Sa, D. J. Seo, J. Woo, J. T. Lim, J. Y. Cheon, S. Y. Yang, J. M. Lee, D. Kang, T. J. Shin and H. S. Shin, *J. Am. Chem. Soc.*, 2016, **138**, 15046-15056.
- 22 W. J. Jiang, L. Gu, L. Li, Y. Zhang, X. Zhang, L. J. Zhang, J. Q. Wang, J. S. Hu, Z. D. Wei and L. J. Wan, *J. Am. Chem. Soc.*, 2016, **138**, 3570-3578.
- 23 Y. J. Sa, C. Park, Y. J. Hu, S. H. Park, G. G. Park and H. J. Sang, *Angew. Chem.*, 2015, **126**, 4186-4190.
- 24 K. Strickland, E. Miner, Q. Jia, U. Tylus, N. Ramaswamy, W. Liang, M. T. Sougrati, F. Jaouen and S. Mukerjee, *Nat. Commun.*, 2015, **6**, 7343.
- 25 B. Y. Xia, Y. Yan, N. Li, H. B. Wu, X. W. Lou and X. Wang, *Nat. Energy*, 2016, **1**, 15006.
- 26 H. L. Fei, R. Q. Ye, G. L. Ye, Y. J. Gong, Z. W. Peng, X. J. Fan, E. L. G. Samuel, P. M. Ajayan and J. M. Tour, *Acs Nano*, 2014, **8**, 10837-10843.
- 27 S. H. Ahn, X. Yu and A. Manthiram, *Adv. Mater.*, 2017, **29**, 1606534.
- 28 J. C. Li, P. X. Hou, S. Y. Zhao, C. Liu, D. M. Tang, M. Cheng, F. Zhang and H. M. Cheng, *Energy Environ. Sci.*, 2016, **9**, 3079-3084.
- 29 R. Cao, R. Thapa, H. Kim, X. Xu, G. K. Min, Q. Li, N. Park, M. Liu and J. Cho, *Nat. Commun.*, 2012, **4**, 2076.
- 30 S. C. Han, X. Y. Hu, J. C. Wang, X. S. Fang and Y. F. Zhu, *Adv. Energy Mater.*, 2018, **8**, 1800955.
- 31 G. A. Ferrero, K. Preuss, A. Marinovic, A. B. Jorge, N. Mansor, D. J. Brett, A. B. Fuertes, M. Sevilla and M. M. Titirici, *Acs Nano*, 2016, **10**, 5922-5932.
- 32 F. L. Meng, Z. L. Wang, H. X. Zhong, J. Wang, J. M. Yan and X. B. Zhang, *Adv. Mater.*, 2016, **28**, 7948-7955.
- 33 J. D. Yi, R. Xu, Q. Wu, T. Zhang, K. T. Zang, J. Luo, Y. L. Liang, Y. B. Huang and R. Cao, *ACS Energy Lett.*, 2018, **3**, 883-889.
- 34 C. Dominguez, F. J. Pérez-Alonso, M. A. Salam, S. A. AlThabaiti, M. A. Peña, L. Barrio and S. Rojas, *J. Mater. Chem. A*, 2015, **3**, 24487-24494.

- 35 J. Zhu, M. Xiao, C. Liu, J. Ge, J. St-Pierre and X. Wei, *J. Mater. Chem. A*, 2015, **3**, 21451-21459.
- 36 J. T. Jin, F. P. Pan, L. H. Jiang, X. G. Fu, A. M. Liang, Z. Y. Wei, J. Y. Zhang and G. Q. Sun, *Acs Nano*, 2014, **8**, 3313-3321.
- 37 H. Fei, X. Chen, Y. Shen, L. Ying, A. Liu, S. Liu, T. Mori and Y. Zhang, *J. Mater. Chem. A*, 2016, **4**, 6630-6638.
- 38 Y. Qian, D. Pan, P. Wu, C. Cai and D. F. Gervasio, *J. Phys. Chem. C*, 2016, **120**, 9884-9896.
- 39 T. N. Tran, K. P. Singh, M. Y. Song, D. S. Yang and J. S. Yu, *J. Mater. Chem. A*, 2016, **4**, 8645-8657.
- 40 Y. Zhang, L. B. Huang, W. Jiang, X. Zhang, Y. Y. Chen, Z. Wei, L. J. Wan and J. S. Hu, *J. Mater. Chem. A*, 2016, **4**, 7781-7787.
- 41 W. Wei, X. M. Shi, P. Gao, S. S. Wang, W. Hu, X. X. Zhao, Y. M. Ni, X. Y. Xu, Y. Q. Xu, W. S. Yan, H. X. Ji and M. H. Cao, *Nano Energy*, 2018, **52**, 29-37.
- 42 H. W. Liang, X. Zhuang, S. Brüller, X. Feng and K. Müllen, *Nat. Commun.*, 2014, **5**, 4973.
- 43 S. L. Zhao, H. J. Yin, L. Du, L. C. He, K. Zhao, L. Chang, G. P. Yin, H. J. Zhao, S. Q. Liu and Z. Y. Tang, *ACS Nano*, 2014, **8**, 12660-12668.
- 44 B. Guan, L. E. Yu and X. W. Lou, *Energy Environ. Sci.*, 2016, **9**, 3092-3096.
- 45 J. Guo, Y. Li, Y. Cheng, L. Dai and Z. Xiang, *Acs Nano*, 2017, **11**, 8379-8386.
- 46 L. Yang, D. J. Cheng, H. X. Xu, X. F. Zeng, X. Wan, J. L. Shui, Z. H. Xiang and D. P. Cao, *P. Natl. Acad. Sci. USA*, 2018, **115**, 6626-6631.
- 47 T. Liu, P. P. Zhao, X. Hua, W. Luo, S. L. Chen and G. Z. Cheng, *J. Mater. Chem. A*, 2016, **4**, 11357-11364.
- 48 Q. Li, P. Xu, W. Gao, S. G. Ma, G. Q. Zhang, R. G. Cao, J. Cho, H. L. Wang and G. Wu, *Adv. Mater.*, 2014, **26**, 1378-1386.
- 49 Z. P. Miao, X. M. Wang, M. C. Tsai, Q. Q. Jin, J. S. Liang, F. Ma, T. Y. Wang, S. J. Zheng, B. J. Hwang, Y. H. Huang, S. J. Guo and Q. Li, *Adv. Energy Mater.*, 2018, **8**, 1801226.
- 50 Q. X. Lai, J. J. Zhu, Y. X. Zhao, Y. Y. Liang, J. P. He and J. H. Chen, *Small* 2017, **13**, 1700740.
- 51 P. Yin, T. Yao, Y. Wu, L. Zheng, Y. Lin, W. Liu, H. Ju, J. Zhu, X. Hong and Z. Deng, *Angew. Chem. Int. Ed.*, 2016, **55**, 10958-10963.

- 52 I. S. Amiinu, X. B. Liu, Z. H. Pu, W. Q. Li, Q. D. Li, J. Zhang, H. L. Tang, H. N. Zhang and S. C. Mu, *Adv. Funct. Mater.*, 2018, **28**, 1704638.
- 53 S. Liu, Z. Wang, S. Zhou, F. Yu, M. Yu, C. Y. Chiang, W. Zhou, J. Zhao and J. Qiu, *Adv. Mater.*, 2017, **29**, 1700874.
- 54 C. Zhang, B. An, L. Yang, B. Wu, W. Shi, Y. C. Wang, L. S. Long, C. Wang and W. B. Lin, *J. Mater. Chem. A*, 2016, **4**, 4457-4463.
- 55 L. Ge, Y. Yang, L. Wang, W. Zhou, R. De Marco, Z. Chen, J. Zou and Z. Zhu, *Carbon*, 2015, **82**, 417-424.
- 56 H. Zhang, Z. Wei, C. Tao, B. Guan and X. W. Lou, *Energy Environ. Sci.*, 2018, **11**, 1980-1984.
- 57 A. J. Han, W. X. Chen, S. L. Zhang, M. L. Zhang, Y. H. Han, J. Zhang, S. F. Ji, L. R. Zheng, Y. Wang, L. Gu, C. Chen, Q. Peng, D. s. Wang and Y. d. Li, *Adv. Mater.*, 2018, **30**, 1706508.
- 58 Y. L. Liu, F. J. Chen, Y. Wen, Z. Min, H. Na, F. P. Zhao, X. X. Wang and Y. G. Li, *Adv. Funct. Mater.*, 2017, **27**, 1606034.
